# Supplementary material for: Effectiveness of a targeted brief intervention for recent suicide attempt survivors: a randomised controlled trial protocol
Source: PubMed Central journal article supplement — BMJ Open. 2023 Mar 3;13(3):e070105. doi: 10.1136/bmjopen-2022-070105 (PMC9990685; doi:10.1136/bmjopen-2022-070105), 2023-03-03
Supplement: bmjopen-2022-070105.reviewer_comments.pdf [file bmjopen-2022-070105.reviewer_comments.pdf]

## PEER REVIEW HISTORY

BMJ Open publishes all reviews undertaken for accepted manuscripts. Reviewers are asked to complete a checklist review form (<http://bmjopen.bmj.com/site/about/resources/checklist.pdf>) and are provided with free text boxes to elaborate on their assessment. These free text comments are reproduced below.

## ARTICLE DETAILS

|                            |                                                                                                                                                                                                                                             |
|----------------------------|---------------------------------------------------------------------------------------------------------------------------------------------------------------------------------------------------------------------------------------------|
| <b>TITLE (PROVISIONAL)</b> | Effectiveness of a Targeted Brief Intervention for Recent Suicide Attempt Survivors: A Randomized Controlled Trial Protocol                                                                                                                 |
| <b>AUTHORS</b>             | Pisani, Anthony; Connor, Kenneth; Van Orden, Kimberly; Jordan, Neil; Landes, Sara; Curran, Geoffrey; McDermott, M; Ertefaie, Ashkan; Kelberman, Caroline; Ramanathan, Seethalakshmi; Carruthers, Jay; Mossgraber, Kristina; Goldston, David |

This article was not externally reviewed at BMJ Open. Protocols that have been independently assessed prior to submission to BMJ Open are usually fast-tracked to publication on the grounds that further substantial changes will not be possible. This independent assessment will usually be external, independent review for both a substantial grant award from a non-commercial or government funder and ethics approval.
